# Supplementary material for: The Efficacy of Li-ESWT Combined With VED in Diabetic ED Patients Unresponsive to PDE5is: A Single-Center, Randomized Clinical Trial
Source: PubMed Central journal article supplement (PMC9259797; doi:10.3389/fendo.2022.937958), 2022-06-23
Supplement: Image_1.pdf [file Image_1.pdf]

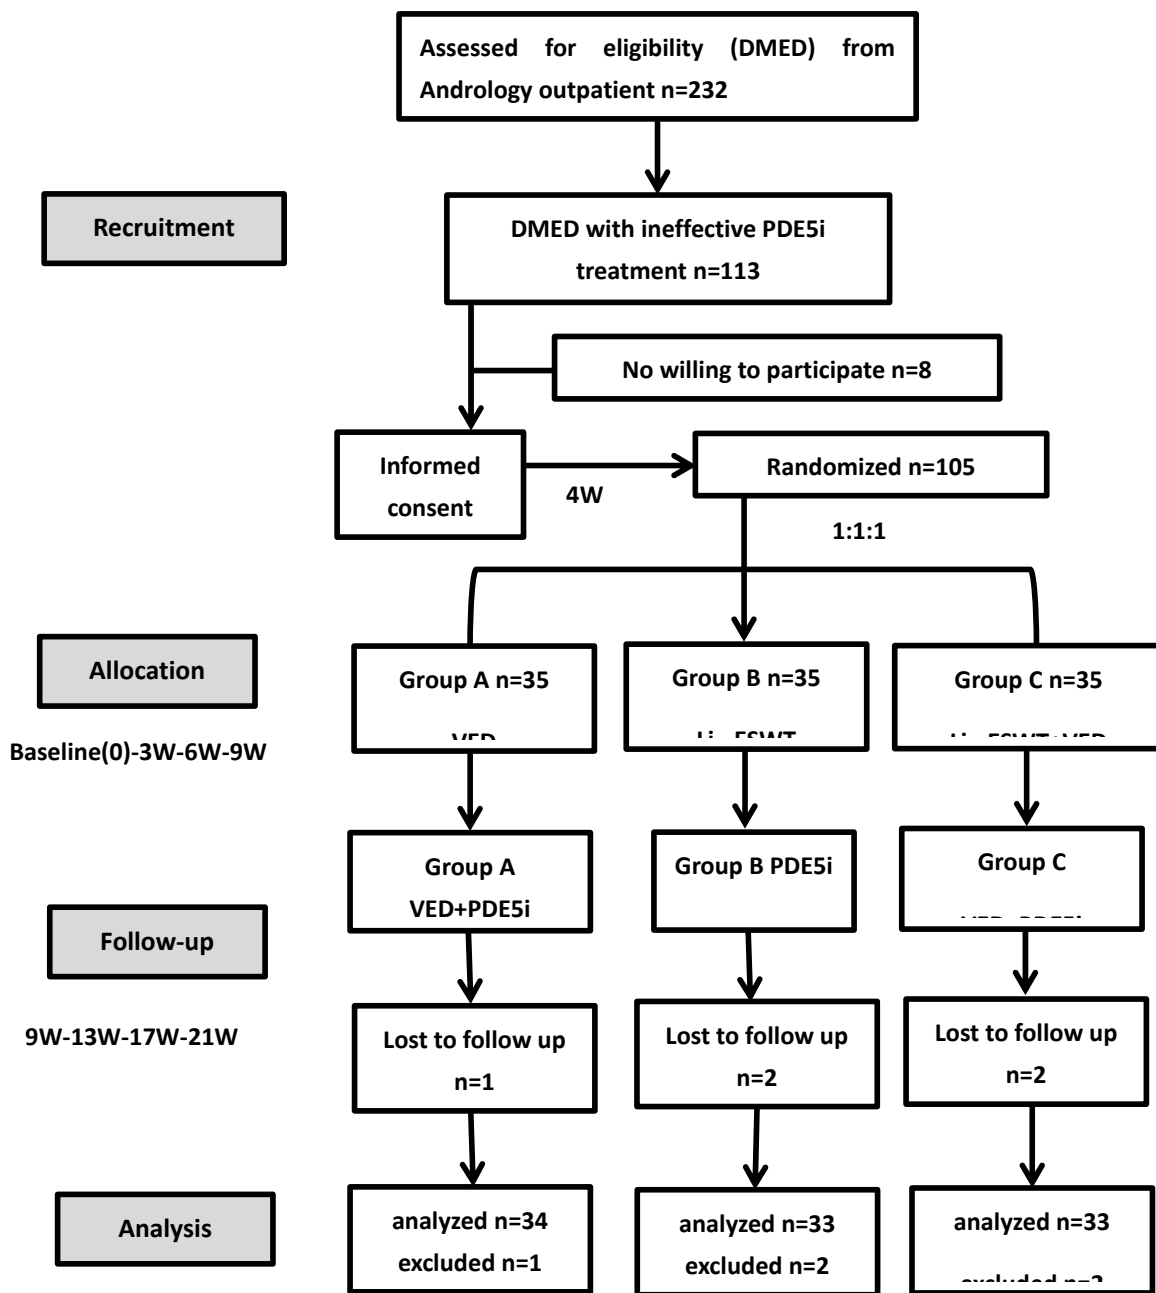

Supplementary Figure 1 The design of this study
